# Supplementary material
Source: PubMed Central journal article supplement (PMC6525047)
Supplement: NIHMS1523803-supplement-1.pdf [file NIHMS1523803-supplement-1.pdf]

**Table S1. Primer Sequences. Related to RT-qPCR in STAR Methods.**

| <b>Name</b>                  | <b>Sequence</b>           |
|------------------------------|---------------------------|
| Human GAPDH Set 1 fwd        | TGATGACATCAAGAAGGTGGTGAAG |
| Human GAPDH Set 1 rev        | TCCTTGGAGGCCATGTGGGCCAT   |
| Human GAPDH Set 2 fwd        | GAAGGTGAAGGTCGGAGTC       |
| Human GAPDH Set 2 rev        | GAAGATGGTGTATGGGATTTC     |
| Human IFN- $\beta$ Set 1 fwd | AAACTCATGAGCAGTCTGCA      |
| Human IFN- $\beta$ Set 1 rev | AGGAGATCTTCAGTTTCGGAGG    |
| Human IFN- $\beta$ Set 2 fwd | CGCCGCATTGACCATCTA        |
| Human IFN- $\beta$ Set 2 rev | GACATTAGCCAGGAGGTTCTC     |
| Human ISG15 fwd              | GCAGATCACCCAGAAGATTG      |
| Human ISG15 rev              | CATTTGTCCACCACCAGCAG      |
| Human RANTES fwd             | TACACCAGTGGCAAGTGCTC      |
| Human RANTES rev             | TGTACTCCCGAACCCATTTC      |
| Human Mx1 fwd                | AGCCACTGGACTGACGACTT      |
| Human Mx1 Rev                | GAGGGCTGAAAATCCCTTTC      |
| Human ISG56 fwd              | GAAGCAGGCAATCACAGAAA      |
| Human ISG56 rev              | TGAAACCGACCATAGTGGAA      |
| Mouse RIPLET for             | CCCCAGGTGACAGTACA         |
| Mouse RIPLET rev             | GCATTGTCCTGTCCAGATC       |
| Mouse ACTIN- $\beta$ fwd     | GAGGTATCCTGACCCTGAAGTA    |
| Mouse ACTIN- $\beta$ rev     | CACACGCAGCTCATTGTAGA      |
| Mouse IFN- $\beta$ fwd       | CAGCCCTCTCCATCAACTATAAG   |
| Mouse IFN- $\beta$ rev       | CCTGTAGGTGAGGTTGATCTTTC   |
| Mouse ISG15 fwd              | CACAGTGATGCTAGTGGTACAG    |
| Mouse ISG15 rev              | CTGCGTCAGAAAGACCTCATAG    |

Note that set 1 primers were used in all studies except for Figure S1D & S1E (performed in the Binder laboratory) where set 2 primers were used.
